# Supplementary material for: Genomic Analysis of the First European Bacteriophages with Depolymerase Activity and Biocontrol Efficacy Against the Phytopathogen<em> Ralstonia solanacearum</em>
Source: Preprints.org preprint supplement (doi:10.20944/preprints202112.0049.v1), 2021-12-03
Supplement: Supplementary file 1 [file supplementary]

## Sheet: F2
ORF	start	stop	lenght (bp)	CG-content	Putative function	Translation
1	387	554	168	57.7		MQLQYFRDLAIGTAFTIAGTPYVKKSARTAYTAPGHPGHWEGRWFWFGQTELVMA*
2	566	685	120	60		MSKVRALAYFFAATTLALAYVGARAAHAAISSLLVMHLH*
3	1047	1406	360	59.7		MQSFTLNIGLIPSKKSSRTARITASEVKAALRGAGFFVSGFRMAQSATEPTAVVRVIARQPMSYHQALYNVSLALVQDCIAVVPDTVRGALIGPDAAEWGEFNPAYFIPFDVEPQAIAA*
4	1483	1671	189	58.7		MYGNFDPSTNAWPFSVEFVDAVGWQVEDNRDPTNVVVMVAGLTFEEAKQRASELNLNHFRGS*
5	1673	1915	243	62.1		MPTLKEASVNAQRPRGGVQAWSVGDTYPVTVVGLGNGPRVQWYAENLHTGERGPVRDAQGDAVVDQYRLWAEFNRNRLQA*
6	2003	2275	273	55.7		MQTKEQRIELIAAMFGEQETGLIGKQLRVLDNSQSGAFYNVGDVGTVVLVDDDGEIWVDFGPDGFKGDGTAYPVWAAGSLGADDHEFLEN*
7	2371	2520	150	57.3		MRTFAIDFMLNGKRVGRDYVTASNEKQATIIAERTAPVTLYDEVVVAPL*
8	2599	2883	285	60.7		MSDKAKQSIEFVRNGLGEENFNKLLSITGVRDIELAAAFLATTKEERDSVKTGDDLMRLLGRKHAENRVAMALVRAGVPVEDAVSFVRETAASL*
9	2960	3289	330	61.2		MSAQAEQTQTAPTIIALLSAANMAQTGPGVFAGVINQATPEERAGVKNMKDLLALYFKVHARVVAEISAEVEATTDHRAPLVDLSDFAETLAEYFSRADEVVPEGVTLQ*
10	3362	3535	174	62.1		MAQMRAWVYKAHWRRHLAAQGIVLRKYEVDKEYMHRGMTQAIFRRNKAKLVAEYTEF*
11	3537	3719	183	59.6		MDIVDELEIGPSYALNSDEKWLRKRAAEEIRRLRKQLADAGWALEAARELEDQRDNGGWL*
12	3716	3841	126	54.8		MKPADGQPKRFKLHTKYPHNRSEGLTHRTNKGTALQVLPKR*
13	3846	4046	201	52.7		MKITLTLEDTADGVAVNWTEEQSEAQNKPSESLATIIAAKFILEINQSHRMGILRLSGTALGADRA*
14	4141	5214	1074	61.6	Phage integrase, tyrosine recombinase	MPVIKRGNKYQASVGSGTDRWRKMFDTQEEAETAELAEKLRRKAAGKDEKGATSSANGAKVQKTLKEAYDRTLALIWKGTAAEKTHIINSNSVMAELGKDTLLSDIATEDVTEMILALEEKGNSGSTVNKKLSCLSMILKTASDEWPGCIVEMPKLKRRKEGSHRLRWINEAEEKRMLEAAEHLGLYDLRDYIIVGIDTGFRRGELLGFPLKDYQGGLMILHDGETKSGKGRAIPVTKRVHEIIQRRSNYSYLFQDYTVHKLRWQFDQLKLHMGLQEDTQFVVHTLRHTCASRMVQRGVPLKVVQEWMGHATIATTMRYAKLAPSSLLMAKKALEEEPQELTFIPPPQMDVVGLHDF*
15	5224	5532	309	54	Phage HNH homing endonuclease	MEHLRETFKGKVQRQAGRDGCWVWQGSKTDRGYGNLWDPKTKKPVSAHRLSYQLHKGQIPEGLMVLHRCDNRACVNPKHLFVGTAQDNTVDMYLKGRGTVPH*
16	5648	8194	2547	62.1	Phage DNA-directed RNA polymerase	MTTQQVDNENEDLVTIQLRLEEEMTQRGADRYIRGVSKAIEKGREDDTAYGKQILAGRLAKLAQAIAEWKAEVASGKPGRKHSAWKLIKDKDDNTLAFLALKHVLSGVSAVRTVQYVAVAIGTAVEDEMRFAKVREAERKKFEQLVTGAAKRTSQHYKHVYATRVAEDVTEWDKWSRTDRLHVGVKLLDLLMQSIGLVEVSTNLDNSEQGLKYVKALPETLEWIERKNEVTALLRPVYEPMVVQPRDWTNPFDGGYLSSNIKPLKLVKTKNKAYLEELRGADMPIVYEAVNAIQRTAWQINSQVLTVMRHLWDSGSELGGLPPREGLPMPPKPYDIDTNDDSKKAYRIAAAKVHMENLSILGQRIGFDMALGIAGRYEKYRRIYFPYQLDFRGRIYAVP…
17	8295	8456	162	60.5		MERNEHEVSDQYESALGRAIAQWRTGRPIPMTLAAELMQQGYDVSALEARHMT*
18	8464	9153	690	62.6	Phage single-stranded DNA-binding protein	MAEKKQRNPSFTSPRGIARYPALNKPDYGNEQFPKPDGEYKVQLILSEAEAQPLIEKLQPLYDAAIEEGKAKFKELKVEQRKKLGALKENDLYATEYDQETEEPTGNLIFKFTMQAGGKNKKGEPWSRKPALFDAKGKPLPKNAPAIWGGSEVKVSFEAAPYFIPGTGAAGLKLRLQAAQVLELVTGGQRSADAYGFGAEDGYEADDNNEEGDEAPDTDGKSGSGEDEF*
19	9173	9598	426	58.5	Phage endonuclease I	MALKYGFRSGLEEKIAADLTSKGAGFTYEELTIPYVKPAKPSKYTPDFDLLKNGIIVESKGRFLTEDRAKHLLVKAQHPDLDIRFVFSNSKAKINKRSPTTYAMWCEKNGFAYADKSVPEAWLKEPPNLESLAAIERLRGA*
20	9600	10052	453	60.3	Phage endolysin	MAYTSNTKKRASTDYLVVHCSATKPSADIGAADIDRWHRKQGWRCIGYHFVIRRDGTIEEGRYADVIGAHVEGHNENSLGICLAGGVSEKDVNVAENNFTPEQFASLQKLLTDLRAKYPKATIQGHRDFPGVAKSCPSFSAKDWAKQNGF*
21	10072	10233	162	54.3		MKAWRKEPNQGAVRIGRKTINAKRVMNKFKPSMVNHGSVLFQRMMLQAGIWAL*
22	10289	10729	441	52.8	Phage restriction endonuclease	MLKICKRCGECKPFSDFHKAPAGKFKLQSYCKQCKKEYTRDTGANILPSIRQRARKQGVPFSLTKENLPPIPEVCPVLGIPLRRTLGFADDNSPSLDRLIPELGYVPGNVEWMSYRANRIKNDSTYEELERVTAWVRERVSTTHPM*
23	10665	12323	1659	58.2	Phage primase/helicase protein	MKNSKGSLPGSESEFLRHIPCEGCGSSDGNSLFSDGHQWCFVCETYVPGDGSEPTIGTTKKRMEGLLTGEFRPLLKRKITEETARKFSYQVGEFKGKTVQLAPYFDNAGVMVAQKVRFPDKEFTVVGDGKAISGILFGQNLWAPGGKKIVVTEGEIDAMSVSQAQGNKWPVVSVPNGAQGAKKSLQKALEYLESFDEVILMFDSDDAGKKAATECAELFSPGKCKIASIPMKDANELLKAGREQEIITAIWQAKEYRPDGIISGAELWEAVSASQDIVESVPYPWDALNEVTKGARTGELVTLTAGSGIGKSAVVREIAHHLLRRGETVGMLMLEENPKRTALGLISISLNRPLHIDREGVSKDQLKVAFDDTVGSGRLFLYDHFGSSDIDNLVSRVRF…
24	12452	13093	642	61.5		MIDDTRLQEFREILDVVRWEFPGSHPVIGGGALRDSYHGRPIKDVDVFMRRRDHETLNSELTRFIRPPILVAHGYGRPDMHGAWDLMQSVAGYEVQLILADFENLEDLAGTFDLGIARATFDGDRLFLHPDFLQDSTDKVFRIRRADNLFEKARSLKRIKRLAEKYPDFSTPDFEHCPVCAQPIIEFRNAASVREHQISGLCQQCQYSVFDKD*
25	13096	13269	174	59.8		MNTFLILLVLIGGQIEGRVIAEFDTPRECEAAKEHVRVINQPPVVASTLVCARDGRA*
26	13284	15125	1842	59.1	Phage DNA-directed DNA polymerase	MKLFDIETNGLLDTVTKVHCLVIKDRTTGRKFRCIPAGFPMQADMTIEQGLGLLKSGPIGGHGILRYDIPVLEKLYPDFTYDKDQVFDTLVAARLIWTHIKDIDNGLLKKKQIPGSLYGSHSLEAWGYRLKLQKGEYAAEFKARMGDAYEGGMEWRELSPEMLDYCDLDVDVTDALFDRIEGKNYSAEALELEHRIAWLMAQQERNGFPFDVTKASALYAKLAQRRGELERELKEFFRFWFAPAGTVTPKVGNKARGTVAGVPYTKVKIVEFNPGSRDHIANRLVTLYGWKPEVFTDGGKPRVDEDVMARLDYPPTKLLTEYLLVSKRISQLAEGDQAWLKVVRDGKIHGSVNPNGAVTGRCTHAFPNVAQVPAVGSPYGEECRGLFGAPKGWLLVGSD…
27	15143	15364	222	59.9		MSMFRDDLLKEVLYEAFKTPFKLQSDFAREFAQEVAALASMGYISTYEGPQQFGKKWRVTGIGLDKLRKLGML*
28	15397	15675	279	58.8		MGRKFRVSYKDDLDGDLGYCEPTKCKIEIENGQHPVEEADTVLHEVLHAVFYLMDIGLSAEEEEHVVRKVVTGLTQVFQDNPRLLTYLANAK*
29	15675	15938	264	57.2		MDHIAKFDSLQEELMTDKKWTITVNVDTPEGHRERTIEFPHRPTEEELGLKLAQFFSRMNFRFNEHLKEVKGCALLTPRRPYESSAD*
30	15919	16659	741	60.5	Phage exonuclease	MKVALIDADVLVFQAAVVAEKATDWGDGVWTLHADEGDGERIVRQSVITLQEKTGADKVILAFSDEENWRKAILPTYKANRAGSRQPIIRAHLKRWASDEYESFTRPTLEGDDVLGILATREGKPGENFIVCSIDKDMRTIPGTHFNFGKNEEFVVTEEGADYWHLFQTLTGDPVDGYAGCPGIGPVAAKKILDKSPTWGAVVSAYDKAGFGEEEALVQARVARICRAEDYDFKKKQVRLWTPKKS*
31	16734	17174	441	61.5		MDDIQDTKDTNPKDAIGSTKLPLDLVPDSLSVFAALAFTEGATKYGAYNWRVAGVRASIYKAALERHLKKWWNGEWADPKTKVPHLASVIACAAIILDADLAGKLTDDRPPAIDLSSFIDSLEETVKHLKELHKDKNPKHYTELNV*
32	17171	17440	270	57		MNPKRNTLTGWVIYDAERATGRSTAIALSLLGKAIANPGVAVQIREHHGTRPADESLMRLMRDMVFRLGLKGMTFSQNLTVTFNLWEPV*
33	17437	17679	243	58.4		MSQSRKGSLIEALINTAIGFGINFTANLIILPLFGFTSLTVQTNLVIGVVYTLISVVRSYVVRRWFNAHIVRAAKKLSGA*
34	17714	17905	192	50.5		MANDKFPPIPKELLEALEKRFPETPLENIGSVDQLRLAQGELRVVRFLRAQFEKQTKNILENT*
35	18124	19683	1560	59.2	Phage collar, head-to-tail connector protein	MEQEKKTCASLYQKLTTDRDPFLKRAYDCAELTIPSLLPREGHNGSTKLVTPWQGIGARGVNNLASKLLLTQLPPGTPPFKLSIDDFTLEELTKQEGMRAKVEEGLNKIERAVQTEIEANYIRVAAFEALKHLIVSGNALLYIPPEGGLRVFHLDRYVVRRDPMGNVLDIITKENVSRDALPDNLVLPDDTEENQEPAAGTKDVELYTHVYRQGRRWKVYQEVKGVRIPGTEGSYPLDKSPWIPVRFTQIDGESYGRGYVEEYIGDLKSLEGLSQAIVEGSAAAAKILFLVNPNGTTDMADVSEAENGAFREGVATDITVLQLQKHNDFRVALETMKDITERLAFAFLLNSAVQRNGERVTAEEVRYMANELESALGGIYSILSQEFQLPLIKRIMYQM…
36	19819	20646	828	61.7	Phage capsid assembly protein	MSVDSVVIKQPDAPVEDQAHIDAMVAKVDAANTSTEPDTPGVPAEGRPQWLPEKFKSPEDLAKAYAELEGKLGGKKDDATPPADDKAAKSDETPDPSKATQDDASKALSEKGLSFDEFSAEFAQKGELTAESYEKLEKAGIPKAVVDQYIAGQQALAESYRKDVTSVAGGDESFAEMVTWAAANLSKEEIAAYNKAVDSGDINQAKLVVAGVYQKFDAAGRGGEPALVTGAGGKVSGDVYESLAQMQKDMASPEYKTDPAFRKKVEQKIARSNIL*
37	20656	21045	390	59		MILESILGSVVVPAIIDLVKGAGGAISRKFFGLSVDDQIKIQNADIEKLKALAALDNPYGTPSQWVVDLRASFRYIGAAAVIAVGCVTLYAGVQTNIEDVKEMGFALVGMPFGFIFGERLYLGLRGKSK*
38	21281	21448	168	57.7	Phage capsid and scaffold protein	MANAVPSRLGQANLAGDPKALFLKVFAGEVMTAFAENNIVLQYVRQRTISSGKSA*
39	21458	21928	471	52.7	Phage endonuclease VII	MNWADSKHPVNSVEPHGGNTEPRLRSTRDGVETRHGEPTKTCACCNVEKPAREFYKKDAQTGRLDGICKSCRIIKTREKTLGVTEDDYRRMYHVQGGRCGICQRRLYSKRYKSFAVDHDHETGKVRGLLCHNCNRGLGMFRDDLTALRRAIDWVKV*
40	22045	22740	696	59.5	Phage major capsid protein	MVITIDDLLLANTFIANIDEAMNHYDVRSVYSSELGKALANQLDRHLLQLAVLAARSAARITGEQGGSVITDAAAGTDSNALVADIFSAAQKLDEKDVPADGRVCFLLPAQYYALAQNTKILNKDWGGAGVYADGKVLRVAGVEIVKTNHLPNTNIASGSTAAGTGDKYIGNFTTTVGVVTQKSALGTVKLMDLAMESEYQIQRQGTLMVAKYAMGHGVLAPQAAVEIKTA*
41	22818	23306	489	63		MATKTQTDRAKDGQDFFQLPAYKDTPTVTVNGTARARTTVPSGVQLATPAAQDDIVAITFNSADPGNTRREVFTPATGATITPTEFCIEARIVPAGTIAALTITFPPNPSKEGQQFRAVTTQTITAVTWTGGSRLNAPTTLAAGRAATFEWSVAKQEWVFIN*
42	23316	23903	588	61.4	Phage tail tubular protein	MTTIVTPTTELEAVNLMLDVIGESPISTLENSAVVDAVKAKAVLSEVSRAVQTKGWHFNTEKGFELVPTVFEKEIIVPANCLRIDTVYPDEGIDAVHRGTRLYDRRRHTYQFDKSVKVDMVVNLQFEELPESARRYIAIRAARVFQARIVGSESLYQFTAEDERDARADLKKAEGITGDYNILTDSWAVRRVIDR*
43	23905	26259	2355	58.9	Phage non-contractile tail tubular protein	MPLVSSSIANMVNGVSQQPFTLRLASQAELQENGLSTVAQGLKKRPPTKHIKRLGSAITGSAYIHTINRDSVERYEVVITNGDLKVYDTAGNQKTVNFPNGKAYLNSTDPATSFRAVTVADYTFIVNKKTVTAASATNSPTRPFESLANVKVGLYSKTYTITVSGVGTATYSTPDGTVAAHAAQITTDYIANQLANGLITLGGFTSVNQVGSVIYIARPTDYTISATDGYNNAALNVIKGTVQRFSDLPANANFQDFTVEIAGDNTSESDNYWVKFDKTGNNSGVWRETIKPGISVGLSPSTMPWVLVRESDGTFTFKPISWTNRLVGDEDSAPHPSFVGRTIQDVFFYRNRLGFIADEAVVMSEAGQFFNFYPTTVTQLLDSDRIDVSASHTKVSNLN…
44	26345	26707	363	59.2	Phage protein, probable scaffold protein	MNGLPAEMNLLLGFRTSARLYAVVWGDETVAVFGIGGVPGVIGFPWMLASPSLSKIRKSFLRECRGYVEGMLQEYRHLENYVWAKNEVHIQWLKWLGFEFEPAAPFGINDEPFHRFYRSM*
45	26707	27273	567	62.3		MCGPAAVPIAMLGISAVGTAASISAQSQQQKAQDAFNQRQYENDMTAYRGNLANIEVQRNQAREDAVAQKQQNDMAGRRATATATTAAGEAGVSGASVDALLRDLAGQAAYDNTNVDENYLRQDRALNAQRENAFNSTASQINQLRPSMSPDYLGAGLRIGQAAAGAYSQYQQNLDYERNQSVPRRGA*
46	27274	29616	2343	60.4		MARVQTDYRTRGTGLQDISSPMLQPQQAGLDNGAAESAARLAQALGAVDLSPLVTAKRYQDVEEAEKARAYANSLTVEELGKQIKDGTLMASHSPVFRATVEHIHGENTLNTFERDTLSKLTRGELKFDTPQAMDEYLTKYRNEALTGSSKFTTAGFDKGYGTFRERAIAVNVKVADEEAVKRGSQEASDNLGNLTLQVTDPMYKGDAAQAIVDRYQLLRKTSLLRDDAAKEALSGVAANLAASGNKALLGSLLDKKLDSGVSVKAALGDLKAIQFTQHAEREYDQAQHQRIDVEIRPFVEQADKGELKRDAFDKWGAANEKYVTTPTIHAIIKGNEAAIERQQKLIAQNALLAQAEATQAQATQAARTAIDQGNLAFLPQQKVMTPQGEQKNFDTKAA…
47	29616	34337	4722	60.8	Phage DNA ejectosome component,peptidoglycanlytic exotransglycosylase	MAASIALGDVQRITSETEKKYGLPEGTLFKIGNIESSFQDGQVSPKGAKGYFQFTDDTARRYGLDDPFDFEKSSDAAGRYMRDNLAKYQGNMDLSLADYNGGPKAAKALAKGKPWAETSDYLAKFYGNKSEPLSQQFTTGSEVPLTASPSASQLYRDARQQESEYGGVGNNILNLPRAIGLGFQVDNSVYNFWQERGLSSVDPDFRWDDDFSKQMLDGVPERHWGYLLQSKSKQEAELRRARLLDTMEKEVELSKMGVAGFGGRLVGNLVDLPTLISFVPGFGGAGLLTTTSRIANAARMAALGAATNVAFDAATMQFRPTATPDDLYISAAMGLGLGAAGGLSVNPARLAAQRLAAENRRLGEFGLRESGKAQIKELGDNGFNFGAGREEFARRIQGK…
48	34388	37081	2694	55	Phage tail fibre protein, pectin_lyase fold	MPYSYVLLSGNGSATNFGFSFGYLSKFHIGVKVNGVVTTFTWVTDFTIGITPAPANGAVIEVRRTTPLNQPAVDWSDGSTLTEADMDLNTRFSLYTAQEAADGVAASITQNSLGQWDGQNRRAVNFADPVDPQDLVNKRYFEDVYTPQLDAKVTEATNQANNAASSAATAQGYALAADNSADLAAALLATFKGQYLGALASNPTLDGNGQPVTAGDLYFSTTDNLMKVYTGSAWINAGSTVQSTIKRPVTPIVATAGQTVFPVSGGYDAPYILVFVNGVEVASPDVDVTNGSTIVFSSGLTAGDKVDYAAFGAFQVANPVIDGTSAADFIKTRNARVVTSIADLKALNKNTYNFVLVTGFYASGDGGGGFFLQVPTMPTNGIVQVGNDGGIWQLVVDRD…
49	37216	37386	171	57.9		MPNIDKDVQKDALKEALTEWLDKQFATFGKWALRSILAAAFSVLMYLYLTSQGWHR*
50	37388	37690	303	55.8	Phage terminase small subunit	MTEKTTASEKELGEVHNEMAAWCLDILKGIPVTDKDGNLVIEDGRVVRLPPAPAYLNVIRQFLKDNDIQAEPAKGSSMGDLSDLPVFEDDNVVPLKSQSK*
51	37790	38284	495	57.4		MKITTAEVSAKRCPKCGEEKHLSELHANHTKRGGHNTICKLCMKQVARDWRNTPPGRSKQMWTTSKKRAEERGWEFNLTPEWIQERLEAGVCEATGIPLEMSAEEFKGYGHFRPWTPSLDRDDPTKGYTTDNVKVVCWMYNQAKGVSMHEAVLRMARALVANDN*
52	38274	39959	1686	57.7	Phage terminase large subunit	MTTKQHPAQKDFRVFMFMVWRHLNLPEPTPVQYDIAHYLQHGPRRSVIEAFRGVGKSWITSALVCWVLWNDPQKKILVISASKERADAFSTFVKRLINELPVLQHLKPKADQRDSMISFDVGPATPDHSPSVKSVGINGQITGSRADIIIADDVEVPNNSATQMMRDKLSEAVKEMDAVIKPLQTSRIIYLGTPQTEMSLYNALPERGYEARIWPALYPELHLVANYKGRLAPFITRALEADKSLVGAPTDPRRFNETDLLERKASYGRAGFALQFMLDTSLSDGDRYPLKIADLIVQNLNPTMAHVKIAWAAAPEVCINDLPAVALTGDRYYRPMWTDQQMSEYTGCVMAIDPSGRGADETGYAIIKILAGNLFLVAAGGLSGGYSDETLETLARLAK…

## Sheet: M2
ORF	start	stop	lenght (bp)	CG-content	Putative function	Translation
1	386	553	168	57.7		MQLQYFRDLAIGTAFTIAGTPYVKKSARTAYTAPGHPGHWEGRWFWFGQTELVMA*
2	565	684	120	60		MSKVRALAYFFAATTLALAYVGARAAHAAISSLLVMHLH*
3	1046	1405	360	59.7		MQSFTLNIGLIPSKKSSRTARITASEVKAALRGAGFFVSGFRMAQSATEPTAVVRVIARQPMSYHQALYNVSLALVQDCIAVVPDTVRGALIGPDAAEWGEFNPAYFIPFDVEPQAIAA*
4	1482	1670	189	58.7		MYGNFDPSTNAWPFSVEFVDAVGWQVEDNRDPTNVAVMVAGLTFEEAKQRASELNLNHFRGS*
5	1672	1914	243	62.1		MPTLKEASVNAQRPRGGVQAWSVGDTYPVTVVGLGNGPRVQWYAENLHTGERGPVRDAQGDAVVDQYRLWAEFNRNRLQA*
6	2002	2274	273	55.7		MQTKEQRIELIAAMFGEQETGLIGKQLRVLDNSQSGAFYNVGDVGTVVLVDDDGEIWVDFGPDGFKGDGTAYPVWAAGSLGADDHEFLEN*
7	2370	2519	150	58.7		MRTFAIDFMLNGKRVGRDYVTASNEKQATIIAERTAPVTLYDEVVAAPL*
8	2598	2882	285	61.1		MSDKAKQSIEFVRNGLGEENFNKLLSITGVRDIELAAAFLATTKEERDSVKTGDDLMRLLGRKHAENRVAMALVRAGVPVEDAVSFVRETAASL*
9	2959	3288	330	60.9		MSAQAKQTQTAPTIIALLSAANMAQTGPGVFAGVINQATPEERAGVKNMKDLLALYFKVHARVVAEISAEVEATTDHRAPLVDLSDFAETLAEYFSRADEVVPEGVTLQ*
10	3361	3534	174	62.1		MAQMRAWVYKAHWRRHLAAQGIVLRKYEVDKEYMHRGMTQAIFRRNKAKLVAEYTEF*
11	3536	3718	183	59.6		MDIVDELEIGPSYALNSDEKWLRKRAAEEIRRLRKQLADAGWALEAARELEDQRDNGGWL*
12	3715	3840	126	54.8		MKPADGQPKRFKLHTKYPHNRSEGLTHRTNKGTALQVLPKR*
13	3845	4045	201	52.7		MKITLTLEDTADGVAVNWTEEQSEAQNKPSESLATIIAAKFILEINQSHRMGILRLSGTALGADRA*
14	4140	5213	1074	61.6	Phage integrase, tyrosine recombinase	MPVIKRGNKYQASVGSGTDRWRKMFDTQEEAETAELAEKLRRKAAGKDEKGATSSANGAKVQKTLKEAYDRTLALIWKGTAAEKTHIINSNSVMAELGKDTLLSDIATEDVTEMILALEEKGNSGSTVNKKLSCLSMILKTASDEWPGCIVEMPKLKRRKEGSHRLRWINEAEEKRMLEAAEHLGLYDLRDYIIVGIDTGFRRGELLGFPLKDYQGGLMILHDGETKSGKGRAIPVTKRVHEIIQRRSNYSYLFQDYTVHKLRWQFDQLKLHMGLQEDTQFVVHTLRHTCASRMVQRGVPLKVVQEWMGHATIATTMRYAKLAPSSLLMAKKALEEEPQELTFIPPPQMDVVGLHDF*
15	5223	5531	309	54	Phage HNH homing endonuclease	MEHLRETFKGKVQRQAGRDGCWVWQGSKTDRGYGNLWDPKTKKPVSAHRLSYQLHKGQIPEGLMVLHRCDNRACVNPKHLFVGTAQDNTVDMYLKGRGTVPH*
16	5647	8193	2547	62.2	Phage DNA-directed RNA polymerase	MTTQQVDNENEDLVTIQLRLEEEMTQRGADRYIRGVSKAIEKGREDDTAYGKQILAGRLAKLAQAIAEWKAEVASGKPGRKHSAWKLIKDTDDNILAFLALKHVLSGVSAVRTVQYVAVAIGTAVEDEMRFAKVREAERKKFEQLVTGAAKRTSQHYKHVYATRVAEDVTEWDKWSRTDRLHVGVKLLDLLMQSIGLVEVSTNLDNSEQGLKYVKALPETLEWIERKNEVTALLRPVYEPMVVQPRDWTNPFDGGYLSSNIKPLKLVKTKNKAYLEELRGADMPIVYEAVNAIQRTAWQINSQVLTVMRHLWDSGSELGGLPPREGLPMPPKPYDIDTNDDSKKAYRIAAAKVHMENLSILGQRIGFDMALGIAGRYEKYRRIYFPYQLDFRGRIYAVP…
17	8294	8455	162	60.5		MERNEHEVSDQYESALGRAIAQWRTGRPIPMTLAAELMQQGYDVSALEARHMT*
18	8463	9152	690	62.3	Phage single-stranded DNA-binding protein	MAEKKQRNPSFTSPRGIARYPALNKPDYGNEQFPKPDGEYKVQLILSEAEAQPLIEKLQPLYDAAIEEGKAKFKELKVEQRKKLGALKENDLYATEYDQETEEPTGNLIFKFTMQAGGKNKKGEPWSRKPALFDAKGKPLPKNAPAIWGGSEVKVSFEAAPYFIPGTGAAGLKLRLQAAQVLELVTGGQRSADAYGFGAEDGYEADDNNEEGDEAPDTDGKSGSGEDEF*
19	9172	9597	426	58.2	Phage endonuclease I	MALKYGFRSGLEEKIAADLTSKGAGFTYEELTIPYVKPAKPSKYTPDFDLLKNGIIVESKGRFLTEDRAKHLLVKAQHPDLDIRFVFSNSKAKINKRSPTTYAMWCEKNGFAYADKSVPEAWLKEPPNLKSLAAIERLRGA*
20	9599	10051	453	60.3	Phage endolysin	MAYTSNTKKRASTDYLVVHCSATKPSADIGAADIDRWHRKQGWRCIGYHFVIRRDGTIEEGRYADVIGAHVEGHNENSLGICLAGGVSEKDVNVAENNFTPEQFASLQKLLTDLRAKYPKATIQGHRDFPGVAKSCPSFSAKDWAKQNGF*
21	10071	10232	162	54.3		MKAWRKEPNQGAVRIGRKTINAKRVMNKFKPSMVNHGSVLFQRMMLQAGIWAL*
22	10288	10728	441	53.1	Phage restriction endonuclease	MLKICKRCGECKPFSDFHKAPAGKFKLQSYCKQCKKEYTRDTGANILPSIRQRARKQGVPFSLTKENPPPIPEVCPVLGIPLRRTLGFADDNSPSLDRLIPELGYVPGNVEWMSYRANRIKNDSTYEELERVTAWVRERVSTTHPM*
23	10664	12322	1659	58.3	Phage primase/helicase protein	MKNSKGSLPGSESEFLRHIPCEGCGSSDGNSLFSDGHQWCFVCETYVPGDGSEPTIGTTKKRMEGLLTGEFRPLLKRKITEETARKFSYQVGEFKGKTVQLAPYFDNAGVMVAQKVRFPDKEFTVVGDGKAISGILFGQNLWAPGGKKIVVTEGEIDAMSVSQAQGNKWPVVSVPNGAQGAKKSLQKALEYLESFDEVILMFDSDDAGKKAAAECAELFSPGKCKIASIPMKDANELLKAGREQEIITAIWQAKEYRPDGIISGAELWEAVSASQDIVESVPYPWDALNEVTKGARTGELVTLTAGSGIGKSAVVREIAHHLLRRGETVGMLMLEENPKRTALGLISISLNRPLHIDREGVSKDQLKVAFDDTVGSGRLFLYDHFGSSDIDNLVSRVRF…
24	12451	13092	642	61.2		MIDDTRLQEFREILDVVRWEFPGSHPVIGGGALRDSYHGRPIKDVDVFMRRRDHETLNSELTRFIRPPILVAHGYGRPDMHGAWDLMQSVAGYEVQLILADFENLEDLAGTFDLGIARATFDGDRLFLHPDFLQDSTDKVFRIRRADNLFEKARSLKRIKRLAEKYPDFSTPDFEHCPVCAQPIIEFRNAASVREHQISGLCQQCQYLVFDKD*
25	13095	13268	174	59.8		MNTFLILLVLIGGQIEGRVIAEFDTPRECEAAKEHVRVINQPPVVASTLVCARDGRA*
26	13283	15124	1842	59.2	Phage DNA-directed DNA polymerase	MKLFDIETNGLLDTVTKVHCLVIKDRTTGRKFRCIPAGFPMQADMTIEQGLELLKSGPIGGHGILRYDIPVLEKLYPDFTYDKDQVFDTLVAARLIWTHIKDIDNGLLKKKQIPGSLYGSHSLEAWGYRLKLQKGEYAAEFKARVGDAYEGGMEWRELSPEMLDYCDLDVDVTDALFDRIEGKNYSAEALELEHRIAWLMAQQERNGFPFDVTKASALYAKLAQRRGELERELKEFFRFWFAPAGTVTPKVGNKARGTVAGVPYTKVKIVEFNPGSRDHIANRLVTLYGWKPEVFTDGGKPRVDEDVMARLDYPPTKLLTEYLLVSKRISQLAEGDQAWLKVVRDGKIHGSVNPNGAVTGRCTHAFPNVAQVPAVGSPYGEECRGLFGAPKGWLLVGSD…
27	15142	15363	222	59.9		MSMFRDDLLKEVLYEAFKTPFKLQSDFAREFAQEVAALASMGYISTYEGPQQFGKKWRVTGIGLDKLRKLGML*
28	15396	15674	279	58.8		MGRKFRVSYKDDLDGDLGYCEPTKCKIEIENGQHPVEEADTVLHEVLHAVFYLMDIGLSAEEEEHVVRKVVTGLTQVFQDNPRLLTYLANAK*
29	15674	15937	264	57.2		MDHIAKFDSLQEELMTDKKWTITVNVDTPEGHRERTIEFPHRPTEEELGLKLAQFFSRMNFRFNEHLKEVKGCALLTPRRPYESSAD*
30	15918	16658	741	60.5	Phage exonuclease	MKVALIDADVLVFQAAVVAEKATDWGDGVWTLHADEGDGERIVRQSVITLQEKTGADKVILAFSDEENWRKAILPTYKANRAGSRQPIIRAHLKRWASDEYESFTRPTLEGDDVLGILATREGKPGENFIVCSIDKDMRTIPGTHFNFGKNEEFVVTEEGADYWHLFQTLTGDPVDGYAGCPGIGPVAAKKILDKSPTWGAVVSAYDKAGFGEEEALVQARVARICRAEDYDFKKKQVRLWTPKKS*
31	16733	17173	441	61.5		MDDIQDTKDTNPKDAIGSTKLPLDLVPDSLSVFAALAFTEGATKYGAYNWRVAGVRASIYKAALERHLKKWWNGEWADPKTKVPHLASVIACAAIILDADLAGKLTDDRPPAIDLSSFIDSLEETVKHLKELHKDKNPKHYTELNV*
32	17170	17439	270	57		MNPKRNTLTGWVIYDAERATGRSTAIALSLLGKAIANPGVAVQIREHHGTRPADESLMRLMRDMVFRLGLKGMTFSQNLTVTFNLWEPV*
33	17436	17678	243	58.4		MSQSRKGSLIEALINTAIGFGINFTANLIILPLFGFTSLTVQTNLVIGVVYTLISVVRSYVVRRWFNAHIVRAAKKLSGA*
34	17713	17904	192	50.5		MANDKFPPIPKELLEALEKRFPETPLENIGSVDQLRLAQGELRVVRFLRAQFEKQTKNILENT*
35	18123	19682	1560	59.2	Phage collar, head-to-tail connector protein	MEQEKKTCASLYQKLTTDRDPFLKRAYDCAELTIPSLLPREGHNGSTKLVTPWQGIGARGVNNLASKLLLTQLPPGTPPFKLSIDDFTLEELTKQEGMRAKVEEGLNKIERAVQTEIEANYIRVAAFEALKHLIVSGNALLYIPPEGGLRVFHLDRYVVRRDPMGNVLDIITKENVSRDALPDNLVLPDDTEENQEPAAGTKDVELYTHVYRQGRRWKVYQEVKGVRIPGTEGSYPLDKSPWIPVRFTQIDGESYGRGYVEEYIGDLKSLEGLSQAIVEGSAAAAKILFLVNPNGTTDMADVSEAENGAFREGVATDITVLQLQKHNDFRVALETMKDITERLAFAFLLNSAVQRNGERVTAEEVRYMANELESALGGIYSILSQEFQLPLIKRIMYQM…
36	19818	20645	828	61.5	Phage capsid assembly protein	MSVDSVVIKQPDAPVEDQAHIDAMVAKVDAANTSTEPDTPEVPAEGRPQWLPEKFKSPEDLAKAYAELEGKLGGKKDDATPPADDKAAKSDETPDPSKATQDDASKALSEKGLSFDEFSAEFAQKGELTAESYEKLEKAGIPKAVVDQYIAGQQALAESYRKDVTSVAGGDESFAEMVTWAAANLSKEEIAAYNKAVDSGDINQAKLVVAGVYQKFDAAGRGGEPALVTGAGGKVSGDVYESLAQMQKDMASPEYKTDPAFRKKVEQKIARSNIL*
37	20655	21044	390	59		MILESILGSVVVPAIIDLVKGAGGAISRKFFGLSVDDQIKIQNADIEKLKALAALDNPYGTPSQWVVDLRASFRYIGAAAVIAVGCVTLYAGVQTNIEDVKEMGFALVGMPFGFIFGERLYLGLRGKSK*
38	21280	21447	168	57.7	Phage capsid and scaffold protein	MANAVPSRLGQANLAGDPKALFLKVFAGEVMTAFAENNIVLQYVRQRTISSGKSA*
39	21457	21927	471	52.9	Phage endonuclease VII	MNWADSKHPVNSVEPHGGNTEPRLRSTRDGVETRHGEPTKTCACCNVEKPAREFYKKDAQTGRLDGICKSCRIIKTREKTLGVTEDDYRRMYHVQGGRCGICQRRLYSKRYKSFAVDHDHETGKVRGLLCHNCNRGLGMFRDDPTALRRAIDWVKV*
40	22044	22739	696	59.5	Phage major capsid protein	MVITIDDLLLANTFIANIDEAMNHYDVRSVYSSELGKALANQLDRHLLQLAVLAARSAARITGEQGGSVITDAAAGTDSNALVADIFSAAQKLDEKDVPADGRVCFLLPAQYYALAQNTKILNKDWGGAGVYADGKVLRVAGVEIVKTNHLPNTNIASGSTAAGTGDKYIGNFTTTVGVVTQKSALGTVKLMDLAMESEYQIQRQGTLMVAKYAMGHGVLAPQAAVEIKTA*
41	22817	23305	489	63.4		MATKTQTDRAKDGQDFFQLPAHKDTPAVTVNGTARARTTVPSGVQLATPAAQDDIVAITFNSADPGNTRREVFTPATGATITPTEFCIEARIVPAGTIAALTITFPPNPSKEGQQFRAVTTQTITAVTWTGGSRLNAPTTLAAGRAATFEWSVAKQEWVFIN*
42	23315	23902	588	61.2	Phage tail tubular protein	MTTIVTPTTELEAVNLMLDVIGESPISTLENSAVVDAVKAKAVLSEVSRAVQTKGWHFNTEKGFELVPTVFEKEIIVPANCLRIDTVYPDEGIDAVHRGTRLYDRRRHTYQFDKSVKVDMVVNLQFEELPESARRYIAIRAARVFQARIVGSESLYQFTAEDERDARADLKKAEGITGDYNILTDSWAVRRVIDR*
43	23904	26258	2355	58.9	Phage non-contractile tail tubular protein	MPLVSSSIANMVNGVSQQPFTLRLASQAELQENGLSTVAQGLKKRPPTKHIKRLGSAITGSAYIHTINRDSVERYEVVITNGDLKVYDTAGNQKTVNFPNGKAYLNSTDPATSFRAVTVADYTFIVNKKTVTAASATNSPTRPFESLANVKVGLYSKTYTITVSGVGTATYSTPDGTVAAHAAQITTDYIANQLANGLITLGGFTSVNQVGSVIYIARPTDYTISATDGYNNAALNVIKGTVQRFSDLPANANFQDFTVEIAGDNTSESDNYWVKFDKTGNNSGVWRETIKPGISVGLSPSTMPWVLVRESDGTFTFKPISWTNRLVGDEDSAPHPSFVGRTIQDVFFYRNRLGFIADEAVVMSEAGQFFNFYPTTVTQLLDSDRIDVSASHTKVSNLN…
44	26344	26706	363	59.2	Phage protein, probable scaffold protein	MNGLPAEMNLLLGFRTSARLYAVVWGDETVAVFGIGGVPGVIGFPWMLASPSLSKIRKSFLRECRGYVEGMLQEYRHLENYVWAKNEVHIQWLKWLGFEFEPAAPFGINDEPFHRFYRSM*
45	26706	27272	567	62.3		MCGPAAVPIAMLGISAVGTAASISAQSQQQKAQDAFNQRQYENDMTAYRGNLANIEVQRNQAREDAVAQKQQNDMAGRRATATATTAAGEAGVSGASVDALLRDLAGQAAYDNTNVDENYLRQDRALNAQRENAFNSTASQINQLRPSMSPDYLGAGLRIGQAAAGAYSQYQQNLDYERNQSVPRRGA*
46	27273	29615	2343	60.4		MARVQTDYRTRGTGLQDISSPMLQPQQAGLDNGAAESAARLAQALGAVDLSPLVTAKRYQDVEEAEKARAYANSLTVEELGKQIKDGTLMASHSPVFRATVEHIHGENTLNTFERDTLSKLTRGELKFDTPQAMDEYLTKYRNEALTGSSKFTTAGFDKGYGTFRERAIAVNVKVADEEAVKRGSQEASDNLGNLTLQVTDPMYKGDAAQAIVDRYQLLRKTSLLRDDAAKEALSGVAANLAASGNKALLGSLLDKKLDSGVSVKAALGDLKAIQFTQHAEREYDQAQHQRIDVEIRPFVEQADKGELKRDAFDKWGAANEKYVTTPTIHAIIKGNEAAIERQQKLIAQNALLAQAEATQAQATQAARTAIDQGNLAFLPQQKVMTPQGEQKNFDTKAA…
47	29615	34336	4722	60.8	Phage DNA ejectosome component, peptidoglycanlytic exotransglycosylase	MAASIALGDVQRITSETEKKYGLPEGTLFKIGNIESSFQDGQVSPKGAKGYFQFTDDTARRYGLDDPFDFEKSSDAAGRYMRDNLAKYQGNMDLSLADYNGGPKAAKALAKGKPWAETSDYLAKFYGNKSEPLSQQFTTGSEVPLTASPSASQLYRDARQQESEYGGVGNNILNLPRAIGLGFQVDNSVYNFWQERGLSSVDPDFRWDDDFSKQMLDGVPERHWGYLLQSKSKQEAELRRARLLDTMEKEVELSKMGVAGFGGRLVGNLVDLPTLISFVPGFGGAGLLTTTSRIANAARMAALGAATNVAFDAATMQFRPTATPDDLYISAAMGLGLGAAGGLSVNPARLAAQRLAAENRRLGEFGLRESGKAQIKELGDNGFNFGAGREEFARRIQGK…
48	34387	37080	2694	55.1	Phage tail fibre protein, pectin_lyase fold	MPYSYVLLSGNGSATNFGFSFGYLSKFHIGVKVNGVVTTFTWVTDFTIGITPAPANGAVIEVRRTTPLNQPAVDWSDGSTLTEADMDLNTRFSLYTAQEAADGVAASITQNSLGQWDGQNRRAVNFADPVDPQDLVNKRYFEDVYTPQLDAKVTEATNQANNAASSAATAQGYALAADNSADLAAALLATFKGQYLGALASNPTLDGNGQPVTAGDLYFSTTDNLMKVYTGSAWINAGSTVQSTIKRPVTPVVATAGQTVFPVSGGYDAPYILVFVNGVEVASPDVDVTNGSTIVFSSGLTAGDKVDYAAFGAFQVANPVIDGTSAADFIKTRNARVVTSIADLKALNKNTYNFVLVTGFYASGDGGGGFFLQVPTMPTNGIVQVGNDGGIWQLVVDRD…
49	37215	37385	171	57.9		MPNIDKDVQKDALKEALTEWLDKQFATFGKWALRSILAAAFSVLMYLYLTSQGWHR*
50	37387	37689	303	56.4	Phage terminase small subunit	MTEKTTASEKELGEVHNEMAAWCLDILKGIPVTDKDGNLVIEDGRVARLPPAPAYLNVIRQFLKDNDIQAEPAKGSSMGDLSDLPVFEDDNVVPLKSQSK*
51	37789	38283	495	57.2		MKITTAEVSAKRCPKCGEEKHLSELHANHTKRDGHNTICKLCMKQVARDWRNTPPGRSKQMWTTSKKRAEERGWEFNLTPEWIQERLEAGVCEATGIPLEMSAEEFKGYGHFRPWTPSLDRDDPTKGYTTDNVKVVCWMYNQAKGVSMHEAVLRMARALVANDN*
52	38273	39958	1686	57.7	Phage terminase large subunit	MTTKQHPAQKDFRVFMFMVWRHLNLPEPTPVQYDIAHYLQHGPRRSVIEAFRGVGKSWITSALVCWVLWNDPQKKILVISASKERADAFSTFVKRLINELPVLQHLKPKADQRDSMISFDVGPATPDHSPSVKSVGINGQITGSRADIIIADDVEVPNNSATQMMRDKLSEAVKEMDAVIKPLQTSRIIYLGTPQTEMSLYNALPERGYEARIWPALYPELHLVANYKGRLAPFITRALEADKSLVGAPTDPRRFNETDLLERKASYGRAGFALQFMLDTSLSDGDRYPLKIADLIVQNLNPTMAHVKIAWAAAPEVCINDLPAVALTGDRYYRPMWTDQQMSEYTGCVMAIDPSGRGADETGYAIIKILAGNLFLVAAGGLSGGYSDETLETLARLAK…

## Sheet: R2
ORF	start	stop	lenght (bp)	CG-content	Putative function	Translation
1	387	554	168	57.7		MQLQYFRDLAIGTAFTIAGTPYVKKSARTAYTAPGHPGHWEGRWFWFGQTELVMA*
2	566	685	120	59.2		MSKVRALAYFFAATTLALTYVGARAAHAAISSLLVMHLH*
3	1047	1406	360	59.7		MQSFTLNIGLIPSKKSSRTARITASEVKAALRGAGFFVSGFRMAQSATEPTAVVRVIARQPMSYHQALYNVSLALVQDCIAVVPDTVRGALIGPDAAEWGEFNPAYFIPFDVEPQAIAA*
4	1483	1671	189	58.2		MYGNFDPSTNAWPFSVEFVDAVGWQVEDNRDPTNVVVMVAGLTFEEAKQRASELNLNHFRGS*
5	1673	1915	243	62.1		MPTLKEASVNAQRPRGGVQAWSVGDTYPVTVVGLGNGPRVQWYAENLHTGERGPVRDAQGDAVVDQYRLWAEFNRNRLQA*
6	2003	2275	273	55.7		MQTKEQRIELIAAMFGEQETGLIGKQLRVLDNSQSGAFYNVGDVGTVVLVDDDGEIWVDFGPDGFKGDGTAYPVWAAGSLGADDHEFLEN*
7	2371	2520	150	58		MRTFAIDFMLNGKRVGRDYVTASNEKQATIIAERTAPVTLYDEVVVAPL*
8	2599	2883	285	60.7		MSDKAKQSIEFVRNGLGEENFNKLLSITGVRDIELAAAFLATTKEERDSVKTGDDLMRLLGRKHAENRVAMALVRAGVPVEDAVSFVRETAASL*
9	2960	3289	330	61.2		MSAQAEQTQTAPTIIALLSAANMAQTGPGVFAGVINQATPEERAGVKNMKDLLALYFKVHARVVAEISAEVEATTDHRAPLVDLSDFAETLAEYFSRADEVVPEGVTLQ*
10	3362	3535	174	62.1		MAQMRAWVYKAHWRRHLAAQGIVLRKYEVDKEYMHRGMTQAIFRRNKAKLVAEYTEF*
11	3537	3719	183	59		MDIVDELEIGPSYVLNSDEKWLRKRAAEEIRRLRKQLADAGWALEAARELEDQRDNGGWL*
12	3716	3841	126	54.8		MKPADGQPKRFKLHTKYPHNRSEGLTHRTNKGTALQVLPKR*
13	3846	4046	201	52.7		MKITLTLEDTADGVAVNWTEEQSEAQNKPSESLATIIAAKFILEINQSHRMGILRLSGTALGADRA*
14	4141	5214	1074	61.5	Phage integrase, tyrosine recombinase	MPVIKRGNKYQASVGSGTDRWRKMFDTQEEAETAELAEKLRRKAAGKDEKGATSSANGAKVQKTLKEAYDRTLALIWKGTAAEKTHIINSNSVMAELGKDTLLSDIATEDVTEMILALEEKGNSGSTVNKKLSCLSMILKTASDEWPGCIVEMPKLKRRKEGSHRLRWINEAEEKRMLEAAEHLGLYDLRDYIIVGIDTGFRRGELLGFPLKDYQGGLMILHDGETKSGKGRAIPVTKRVHEIIQRRSNYSYLFQDYTVHKLRWQFDQLKLHMGLQEDTQFVVHTLRHTCASRMVQRGVPLKVVQEWMGHATIATTMRYAKLAPSSLLMAKKALEEEPQELTFIPPPQMDVVELHDF*
15	5224	5532	309	53.7	Phage HNH homing endonuclease	MEHLRETFKGKVQRQAGRDGCWVWQGSKTDRGYGNLWDPKTKKPVSAHRLSYQLHKGQIPEGLMVLHRCDNRACVNPKHLFVGTAQDNTVDMYLKGRGTVPH*
16	5648	8194	2547	62	Phage DNA-directed RNA polymerase	MTTQQVDNENEDLVTIQLRLEEEMTQRGADRYIRGVSKAIEKGREDDTAYGKQILAGRLAKLAQAIAEWKAEVASGKPGRKHSAWKLIKDTDDNILAFLALKHVLSGVSAVRTVQYVAVAIGTAVEDEMRFAKVREAERKKFEQLVTGAAKRTSQHYKHVYATRVAEDVTEWDKWSRTDRLHVGVKLLDLLMQSIGLVEVSTNLDNSEQGLKYVKALPETLEWIERKNEVTALLRPVYEPMVVQPRDWTNPFDGGYLSSNIKPLKLVKTKNKAYLEELRGADMPIVYEAVNAIQRTAWQINSQVLTVMRHLWDSGSELGGLPPREGLPMPPKPYDIDTNDDSKKAYRIAAAKVHMENLSILGQRIGFDMALGIAGRYEKYRRIYFPYQLDFRGRIYAVP…
17	8222	8662	441	59.9	Phage restriction endonuclease	MSECKKCGVALVPGENWYPSLAKKNNQVCKRCHTARSEAKRIEDRETNLPKWMLRNARNRAKAQGLPFDLEESDIQIPLLCPVLGIPLEVSRGHFTDNSPALDKFIPELGYVKGNVAVISQKANVMKSNATIQEVEALAAWMRSRA*
18	8763	8924	162	59.9		MERNEHEVSDQYESALGRAIAQWRTGRPIPMTLAAELMQQGYDVSALEARHMT*
19	8932	9621	690	62.6	Phage single-stranded DNA-binding protein	MAEKKQRNPSFTSPRGIARYPALNKPDYGNEQFPKPDGEYKVQLILSEAEAQPLIEKLQPLYDAAIEEGKAKFKELKVEQRKKLGALKENDLYATEYDQETEEPTGNLIFKFTMQAGGKNKKGEPWSRKPALFDAKGKPLPKNAPAIWGGSEVKVSFEAAPYFIPGTGAAGLKLRLQAAQVLELVTGGQRSADAYGFGAEDGYEADDNNEEGDEAPDTDGKSGSGEDEF*
20	9641	10066	426	57.3	Phage endonuclease I	MALKYGFRSGLEEKIAADLTSKGMGFTYEELTIPYVKPAKPSKYTPDFDLLKNGIIVESKGRFLTEDRAKHLLVKAQHPDLDIRFVFSNSKAKINKRSPTTYAMWCEKNGFAYADKSVPEAWLKEPPNLKSLTAIERLRGA*
21	10068	10520	453	60.3	Phage endolysin	MAYTSNTKKRASTDYLVVHCSATKPSADIGAADIDRWHRKQGWRCIGYHFVIRRDGTIEEGRYADVIGAHVEGHNENSLGICLAGGVSEKDVNVAENNFTPEQFASLQKLLTDLRAKYPKATIQGHRDFPGVAKSCPSFSAKDWAKQNGF*
22	10540	10701	162	54.3		MKAWRKEPNQGAVRIGRKTINAKRVMNKFKPSMVNHGSVLFQRMMLQAGIWAL*
23	10757	11197	441	53.1	Phage restriction endonuclease	MLKICKRCGECKPFSDFHKAPAGKFKLQSYCKQCKKEYTRDTGANILPSIRQRARKQGVPFSLTKENLPPIPEVCPVLGVPLRRTLGFADDNSPSLDRLIPELGYVPGNVEWMSYRANRIKNDSTYEELERVTAWVRERVSTTHPM*
24	11133	12791	1659	58.2	Phage primase/helicase protein	MKNSKGSLPGSESEFLRHIPCEGCGSSDGNSLFSDGHQWCFVCETYVPGDGSEPTIGTTKKRMEGLLTGEFRPLLKRKITEETARKFSYQVGEFKGKTVQLAPYFDNAGVMVAQKVRFPDKEFTVVGDGKAISGILFGQNLWAPGGKKIVVTEGEIDAMSVSQAQGNKWPVVSVPNGAQGAKKSLQKALEYLESFDEVILMFDSDDAGKKAAAECAELFSPGKCKIASIPMKDANELLKAGREQEIITAIWQAKEYRPDGIISGAELWEAVSASQDIVESVPYPWDALNEVTKGARTGELVTLTAGSGIGKSAVVREIAHHLLRRGETVGMLMLEENPKRTALGLISISLNRPLHIDREGVSKDQLKVAFDDTVGSGRLFLYDHFGSSDIDNLVSRVRF…
25	12920	13561	642	61.2		MIDDTRLQEFREILDVVRWEFPGSHPVIGGGALRDSYHGRPIKDVDVFMRRRDHETLNSELTRFIRPPILVAHGYGRPDMHGAWDLMQSVAGYEVQLILADFENLEDLAGTFDLGIARATFDGDRLFLHPDFLQDSTDKVFRIRRADNLFEKARSLKRIKRLAEKYPDFSTPDFEHCPVCAQPIIEFRNAASVREHQISGLCQQCQYSVFDKD*
26	13564	13737	174	59.8		MNTFLILLVLIGGQIEGRVIAEFDTPRECEAAKEHVRVINQPPVVASTLVCARDGRA*
27	13752	15593	1842	59.1	Phage DNA-directed DNA polymerase	MKLFDIETNGLLDTVTKVHCLVIKDRTTGRKFRCIPAGFPMQADMTIEQGLELLKSGPIGGHGILRYDIPVLEKLYPDFTYDKDQVFDTLVAARLIWTHIKDIDNGLLKKKQIPGSLYGSHSLEAWGYRLKLQKGEYAAEFKARMGDAYEGGMEWRELSPEMLDYCDLDVDVTDALFDRIEGKNYSAEALELEHRIAWLMAQQERNGFPFDVTKASALYAKLAQRRGELERELKEFFRFWFAPAGTVTPKVGNKARGTVAGVPYTKVKIVEFNPGSRDHIANRLVTLYGWKPEVFTDGGKPRVDEDVMARLDYPPTKLLTEYLLVSKRISQLAEGDQAWLKVVRDGKIHGSVNPNGAVTGRCTHAFPNVAQVPAVGSPYGEECRGLFGAPKGWLLVGSD…
28	15611	15832	222	59.9		MSMFRDDLLKEVLYEAFKTPFKLQSDFAREFAQEVAALASMGYISTYEGPQQFGKKWRVTGIGLDKLRKLGML*
29	15865	16143	279	58.8		MGRKFRVSYKDDLDGDLGYCEPTKCKIEIENGQHPVEEADTVLHEVLHAVFYLMDIGLSAEEEEHVVRKVVTGLTQVFQDNPRLLTYLANAK*
30	16143	16406	264	57.2		MDHIAKFDSLQEELMTDKKWTITVNVDTPEGHRERTIEFPHRPTEEELGLKLAQFFSRMNFRFNEHLKEVKGCALLTPRRPYESSAD*
31	16387	17127	741	60.5	Phage exonuclease	MKVALIDADVLVFQAAVVAEKATDWGDGVWTLHADEGDGERIVRQSVITLQEKTGADKVILAFSDEENWRKAILPTYKANRAGSRQPIIRAHLKRWASDEYESFTRPTLEGDDVLGILATREGKPGENFIVCSIDKDMRTIPGTHFNFGKNEEFVVTEEGADYWHLFQTLTGDPVDGYAGCPGIGPVAAKKILDKSPTWGAVVSAYDKAGFGEEEALVQARVARICRAEDYDFKKKQVRLWTPKKS*
32	17202	17642	441	61.5		MDDIQDTKDTNPKDAIGSTKLPLDLVPDSLSVFAALAFTEGATKYGAYNWRVAGVRASIYKAALERHLKKWWNGEWADPKTKVPHLASVIACAAIILDADLAGKLTDDRPPAIDLSSFIDSLEETVKHLKELHKDKNPKHYTELNV*
33	17639	17908	270	57		MNPKRNTLTGWVIYDAERATGRSTAIALSLLGKAIANPGVAVQIREHHGTRPADESLMRLMRDMVFRLGLKGMTFSQNLTVTFNLWEPV*
34	17905	18147	243	58.4		MSQSRKGSLIEALINTAIGFGINFTANLIILPLFGFTSLTVQTNLVIGVVYTLISVVRSYVVRRWFNAHIVRAAKKLSGA*
35	18182	18373	192	50.5		MANDKFPPIPKELLEALEKRFPETPLENIGSVDQLRLAQGELRVVRFLRAQFEKQTKNILENT*
36	18592	20151	1560	59.2	Phage collar, head-to-tail connector protein	MEQEKKTCASLYQKLTTDRDPFLKRAYDCAELTIPSLLPREGHNGSTKLVTPWQGIGARGVNNLASKLLLTQLPPGTPPFKLSIDDFTLEELTKQEGMRAKVEEGLNKIERAVQTEIEANYIRVAAFEALKHLIVSGNALLYIPPEGGLRVFHLDRYVVRRDPMGNVLDIITKENVSRDALPDNLVLPDDTEENQEPAAGTKDVELYTHVYRQGRRWKVYQEVKGVRIPGTEGSYPLDKSPWIPVRFTQIDGESYGRGYVEEYIGDLKSLEGLSQAIVEGSAAAAKILFLVNPNGTTDMADVSEAENGAFREGVATDITVLQLQKHNDFRVALETMKDITERLAFAFLLNSAVQRNGERVTAEEVRYMANELESALGGIYSILSQEFQLPLIKRIMYQM…
37	20287	21114	828	61.5	Phage capsid assembly protein	MSVDSVVIKQPDAPVEDQAHIDAMVAKVDAANTSTEPDTPGMPAEGRPQWLPEKFKSPEDLAKAYAELEGKLGGKKDDATPPADDKAAKSDETPDPSKATQDDASKALSEKGLSFDEFSAEFAQKGELTAESYEKLEKAGIPKAVVDQYIAGQQALAESYRKDVTSVAGGDESFAEMVTWAAANLSKEEIAAYNKAVDSGDINQAKLVVAGVYQKFDAAGRGGEPALVTGAGGKVSGDVYESLAQMQKDMASPEYKTDPAFRKKVEQKIARSNIL*
38	21124	21513	390	59		MILESILGSVVVPAIIDLVKGAGGAISRKFFGLSVDDQIKIQNADIEKLKALAALDNPYGTPSQWVVDLRASFRYIGAAAVIAVGCVTLYAGVQTNIEDVKEMGFALVGMPFGFIFGERLYLGLRGKSK*
39	21749	21916	168	57.7	Phage capsid and scaffold protein	MANAVPSRLGQANLAGDPKALFLKVFAGEVMTAFAENNIVLQYVRQRTISSGKSA*
40	21926	22396	471	52.9	Phage endonuclease VII	MNWADSKHPVNSVEPHGGNTEPRLRSTRDGVETRHGEPTKTCACCNVEKPAREFYKKDAQTGRLDGICKSCRIIKTREKTLGVTEDDYRRMYHVQGGRCGICQRRLYSKRYKSFAVDHDHETGKVRGLLCHNCNRGLGMFRDDPTALRRAIDWVKV*
41	22513	23208	696	59.5	Phage major capsid protein	MVITIDDLLLANTFIANIDEAMNHYDVRSVYSSELGKALANQLDRHLLQLAVLAARSAARITGEQGGSVITDAAAGTDSNALVADIFSAAQKLDEKDVPADGRVCFLLPAQYYALAQNTKILNKDWGGAGVYADGKVLRVAGVEIVKTNHLPNTNIASGSTAAGTGDKYIGNFTTTVGVVTQKSALGTVKLMDLAMESEYQIQRQGTLMVAKYAMGHGVLAPQAAVEIKTA*
42	23286	23774	489	62.3		MATKTQTDRAKDGQDFFQLPAYKDTPTVTVNGTVRARTTVSSGVQLATPAAQDDIVAITFNSADPGNTRREVFTPATGATITPTEFCIEARIVPAGTIAALTITFPPNPSKEGQQFRAVTTQTITAVTWTGGSRLNAPTTLAAGRAATFEWSVAKQEWVFIN*
43	23784	24371	588	61.4	Phage tail tubular protein	MTTIVTPTTELEAVNLMLDVIGESPISTLENSAVVDAVKAKAVLSEVSRAVQTKGWHFNTEKGFELVPTVFEKEIIVPANCLRIDTVYPDEGIDAVHRGTRLYDRRRHTYQFDKSVKVDMVVNLQFEELPESARRYIAIRAARVFQARIVGSESLYQFTAEDERDARADLKKAEGITGDYNILTDSWAVRRVIDR*
44	24373	26727	2355	59	Phage non-contractile tail tubular protein	MPLVSSSIANMVNGVSQQPFTLRLASQAELQENGLSTVAQGLKKRPPTKHIKRLGSAITGSAYIHTINRDSVERYEVVITNGDLKVYDTAGNQKTVNFPNGKAYLNSTDPATSFRAVTVADYTFIVNKKTVTAASATNSPTRPFESLANVKVGLYSKTYTITVSGVGTATYSTPDGTVAAHAAQITTDYIANQLANGLITLGGFTSVNQVGSVIYIARPTDYTISATDGYNNAALNVIKGTVQRFSDLPANANFQDFTVEIAGDNTSESDNYWVKFDKTGNNSGVWRETIKPGISVGLSPSTMPWVLVRESDGTFTFKPISWTNRLVGDEDSAPHPSFVGRTIQDVFFYRNRLGFLADEAVVMSEAGQFFNFYPTTVTQLLDSDRIDVSASHTKVSNLN…
45	26813	27175	363	59.2	Phage protein, probable scaffold protein	MNGLPAEMNLLLGFRTSARLYAVVWGDETVAVFGIGGVPGVIGFPWMLASPSLSKIRKSFLRECRGYVEGMLQEYRHLENYVWAKNEVHIQWLKWLGFEFEPAAPFGINDEPFHRFYRSM*
46	27175	27741	567	62.3		MCGPAAVPIAMLGISAVGTAASISAQSQQQKAQDAFNQRQYENDMTAYRGNLANIEVQRNQAREDAVAQKQQNDMAGRRATATATTAAGEAGVSGASVDALLRDLAGQAAYDNTNVDENYLRQDRALNAQRENAFNSTASQINQLRPSMSPDYLGAGLRIGQAAAGAYSQYQQNLDYERNQSVPRRGA*
47	27742	30084	2343	60.5		MARVQTDYRTRGTGLQDISPPMLQPQQAGLDNGAAESAARLAQALGAVDLSPLVTAKRYQDVEEAEKARAYANSLTVEELGKQIKDGTLMASHSPVFRATVEHIHGENTLNTFERDTLSKLTRGELKFDTPQAMDEYLTKYRNEALTGSSKFTTAGFDKGYGTFRERAIAVNVKVADEEAVKRGSQEASDNLGNLTLQVTDPMYKGDAAQAIVDRYQLLRKTSLLRDDAAKEALSGVAANLAASGNKALLGSLLDKKLDSGVSVKAALGDLKAIQFTQHAEREYDQAQHQRIDVEIRPFVEQADKGELKRDAFDKWGAANEKYVTTPTIHAIIKGNEAAIERQQKLIAQNALLAQAEATQAQATQAARTAIDQGNLAFLPQQKVMTPQGEQKNFDTKAA…
48	30084	34805	4722	60.7	Phage DNA ejectosome component,peptidoglycanlytic exotransglycosylase	MAASIALGDVQRITSETEKKYGLPEGTLFKIGNIESSFQDGQVSPKGAKGYFQFTDDTARRYGLDDPFDFEKSSDAAGRYMRDNLAKYQGNMDLSLADYNGGPKAAKALAKGKPWAETSDYLAKFYGNKSEPLSQQFTTGSEVPLTASPSASQLYRDARQQESEYGGVGNNILNLPRAIGLGFQVDNSVYNFWQERGLSSVDPDFRWDDDFSKQMLDGVPERHWGYLLQSKSKQEAELRRARLLDTMEKEVELSKMGVAGFGGRLVGNLVDLPTLISFVPGFGGAGLLTTTSRIANAARMAALGAATNVAFDAATMQFRPTATPDDLYISAAMGLGLGAAGGLSVNPARLAAQRLAAENRRLGEFGLRESGKAQIKELGDNGFNFGAGREEFARRIQGK…
49	34856	37549	2694	55.2	Phage tail fibre protein, pectin_lyase fold	MPYSYVLLSGNGSATNFGFSFGYLSKFHIGVKVNGVVTTFTWVTDFTIGITPAPANGAVIEVRRTTPLNQPAVDWSDGSTLTEADMDLNTRFSLYTAQEAADGVAASITQNSLGQWGGQNRRAVNFADPVDPQDLVNKRYFEDVYTPQLDAKVTEATNQANNAASSAATAQGYALAADNSADLAAALLATFKGQYLGALASNPTLDGNGQPVTAGDLYFSTTDNLMKVYTGSAWINAGSTVQSTIKRPVTPIVATAGQTVFPVSGGYDAPYILVFVNGVEVASPDVDVTNGSTIVFSSGLTAGDKVDYAAFGAFQVANPVIDGTSAADFIKTRNARVVTSIADLKALNKNTYNFVLVTGFYASGDGGGGFFLQVPTMPTNGIVQVGNDGGIWQLVVDRD…
50	37684	37854	171	57.9		MPNIDKDVQKDALKEALTEWLDKQFATFGKWALRSILAAAFSVLMYLYLTSQGWHR*
51	37856	38158	303	56.1	Phage terminase small subunit	MTEKTTASEKELGEVHNEMAAWCLDILKGIPVTDKDGNLVIEDGRVVRLPPAPAYLNVIRQFLKDNDIQAEPAKGSSMGDLSDLPVFEDDNVVPLKSQSK*
52	38258	38752	495	57		MKITTAEVSAKRCPKCGEEKHLSELHANHTKRDGHNTICKLCMKQVARDWRNTPPGRSKQMWTTSKKRAEERGWEFNLTPEWIQERLEAGVCEATGIPLEMSAEEFKGYGHFRPWTPSLDRDDPTKGYTTDNVKVVCWMYNQAKGVSMHEAVLRMARALVANDN*
53	38742	40427	1686	57.7		MTTKQHPAQKDFRVFMFMVWRHLNLPEPTPVQYDIAHYLQHGPRRSVIEAFRGVGKSWITSALVCWVLWNDPQKKILVISASKERADAFSTFVKRLINELPVLQHLKPKADQRDSMISFDVGPATPDHSPSVKSVGINGQITGSRADIIIADDVEVPNNSATQMMRDKLSEAVKEMDAVIKPLQTSRIIYLGTPQTEMSLYNALPERGYEARIWPALYPELHLVANYKGRLAPFITRALEADKSLVGAPTDPRRFNETDLLERKASYGRAGFALQFMLDTSLSDGDRYPLKIADLIVQNLNPTMAHVKIAWAAAPEVCINDLPAVALTGDRYYRPMWTDQQMSEYTGCVMAIDPSGRGADETGYAIIKILAGNLFLVAAGGLSGGYSDETLETLARLAK…
