# Supplementary material for: Genomic Analysis of the First European Bacteriophages with Depolymerase Activity and Biocontrol Efficacy Against the Phytopathogen<em> Ralstonia solanacearum</em>
Source: Preprints.org preprint supplement (doi:10.20944/preprints202112.0049.v1), 2021-12-03
Supplement: Supplementary file 3 [file Table S2.xlsx]

## Sheet: Sheet1
Phage name	gp #	Bacterial host	Genome size (bp)	Packaging strategy	Pubmed link	Paper reference if experimentally determined	Accession (genome)	Accession (terminase)
Enterobacteria phage HK97	gp2	Escherichia coli	39732	3' cos (HK97)	http://www.ncbi.nlm.nih.gov/pubmed/10860721	J. Mol. Biol. 299 (1), 27-51 (2000)	NC_002167.1	NP_037698.1
Enterobacteria phage HK022	gp2	Escherichia coli	40751	3' cos (HK97)	http://www.ncbi.nlm.nih.gov/pubmed/10860721	J. Mol. Biol. 299 (1), 27-51 (2000)	NC_002166.1	NP_037663.1
Rhizobium phage 16-3	gp2	Rhizobium meliloti 41	60195	3' cos (HK97)	http://www.ncbi.nlm.nih.gov/pubmed/15774897	J. Bacteriol. 187 (7), 2526-2531 (2005)	NC_011103.1	YP_002117560.1
Enterobacteria phage Lambda	gp2	Escherichia coli	48502	5' cos (Lambda)	http://www.ncbi.nlm.nih.gov/pubmed/6324174	Proc Natl Acad Sci U S A. 1983 Dec;80(24):7456-60	NC_001416	NP_040581
Enterobacteria phage N15	gp2	Escherichia coli	46375	5' cos (Lambda)	http://www.ncbi.nlm.nih.gov/pubmed/10476025	Mol Microbiol. 1999 Sep;33(5):895-903.	NC_001901.1	NP_046897.1
Enterobacteria phage P2	gp16	Escherichia coli	31200	5' cos (P2)	http://www.ncbi.nlm.nih.gov/pubmed/2265763	Gene. 1990 Nov 30;96(1):9-15	KC618326.1	AGG36517.1
Enterobacteria phage 186	gp3	Escherichia coli	30624	5' cos (P2)	http://www.ncbi.nlm.nih.gov/pubmed/19055764	BMC Microbiol. 2008 Dec 3;8:211	U32222	AAC34148
Pseudomonas phage phiCTX	gp3	Pseudomonas aeruginosa	35580	5' cos (P2)	http://www.ncbi.nlm.nih.gov/pubmed/10027959	Mol Microbiol. 1999 Jan;31(2):399-419.	NC_003278.1	NP_490600.1
Enterobacteria phage T7	gp48	Escherichia coli	39937	Short DTR (T7)	http://www.ncbi.nlm.nih.gov/pubmed/2266564	J Mol Biol. 1990 Dec 20;216(4):939-48	GU071091.1	NP_042010.1
Enterobacteria phage T3	gp45	Escherichia coli	38209	Short DTR (T7)	http://www.ncbi.nlm.nih.gov/pubmed/12079351	J Mol Biol. 2002 Jun 21;319(5):1115-32	KC960671.1	NP_523347.1
Yersinia phage phiYeO3-12	gp56	Yersinia enterocolitica	39600	Short DTR (T7)	http://www.ncbi.nlm.nih.gov/pubmed/11222590	J Bacteriol. 2001 Mar;183(6):1928-37	NC_001271.1	NP_052122.1
Enterobacteria phage N4	gp68	Escherichia coli	70153	Short DTR (N4)	http://www.ncbi.nlm.nih.gov/pubmed/3172206	J Mol Biol. 1988 Jul 5;202(1):1-10	NC_008720.1	YP_950546
Erwinia phage EamP-S6	gp98	Erwinia amylovora	74669	Short DTR (N4)	http://www.ncbi.nlm.nih.gov/pubmed/21764969	Appl Environ Microbiol. 2011 Sep;77(17):5945-54	NC_019514.1	YP_007005834
Achromobacter phage JWDelta	gp81	Achromobacter xylosoxidans	73659	Short DTR (N4)	http://www.ncbi.nlm.nih.gov/pubmed/24468270	Virol J. 2014 Jan 27;11:14	KF787094.1	AHC56597.1
Clostridium phage C-St	gp168	Clostridium botulinum	185683	Short DTR (C-st)	http://www.ncbi.nlm.nih.gov/pubmed/16287978	Proc Natl Acad Sci U S A. 2005 Nov 29;102(48):17472-7	NC_007581.1	YP_398598
Bacillus phage vB_BanS-Tsamsa	gp241	Bacillus anthracis	168876	Short DTR (C-st)	http://www.ncbi.nlm.nih.gov/pubmed/24475065	PLoS One. 2014 Jan 27;9(1):e85972	NC_023007.1	YP_008873483
Bacillus phage Basilisk	gp32	Bacillus cereus	82008	Short DTR (C-st)	http://www.ncbi.nlm.nih.gov/pubmed/25100842	J Virol. 2014 Oct 15;88(20):11846-60	KC595511.2	AGR46580.1
Bacillus phage SPO1	gp54	Bacillus subtilis	132562	Long DTR (SPO1)	http://www.ncbi.nlm.nih.gov/pubmed/19285085	J Mol Biol. 2009 Apr 24;388(1):48-70	FJ230960.1	YP_002300330.1
Listeria phage A511	gp5	Listeria monocytogenes	137619	Long DTR (SPO1)	http://www.ncbi.nlm.nih.gov/pubmed/18567664	J Bacteriol. 2008 Sep;190(17):5753-65	NC_009811.2	YP_001468454.1
Brochothrix phage A9	gp63	Brochothrix thermosphacta	127065	Long DTR (SPO1)	http://www.ncbi.nlm.nih.gov/pubmed/20709901	J Bacteriol. 2010 Oct;192(20):5441-53	NC_015253.1	YP_004301396.1
Enterobacteria phage T4	gp163	Escherichia coli	168903	Headful (T4)	http://www.ncbi.nlm.nih.gov/pubmed/12235385	Nucleic Acids Res. 2002 Sep 15;30(18):4009-21	NC_000866.4	NP_049776.1
Vibrio phage KVP40	gp355	Vibrio parahaemolyticus	244834	Headful (T4)	http://www.ncbi.nlm.nih.gov/pubmed/12923095	J Bacteriol. 2003 Sep;185(17):5220-33	NC_005083.2	NP_899601.1
Enterobacteria phage RB49	gp153	Escherichia coli	164018	Headful (T4)			NC_005066.1	AAF23757.1
Pseudomonas phage phiKZ	gp25	Pseudomonas aeruginosa	280334	Headful (phiKZ)	http://www.ncbi.nlm.nih.gov/pubmed/11916376	J Mol Biol. 2002 Mar 15;317(1):1-19	NC_004629.1	NP_803591.1
Erwinia phage phiEaH2	gp178	Erwinia amylovora	243050	Headful (phiKZ)			NC_019929.1	YP_007237828
Pseudomonas phage 201phi2-1	gp5	Pseudomonas chlororaphis	316674	Headful (phiKZ)			NC_010821.1	YP_001956731.1
Enterobacteria phage P22	gp1	Salmonella enterica	41660	Headful (P22)	http://www.ncbi.nlm.nih.gov/pubmed/1853558	Virology. 1991 Aug;183(2):519-38	AB426868.1	BAG12600.1
Enterobacteria phage LP7	gp3	Salmonella typhimurium		Headful (P22)	http://www.ncbi.nlm.nih.gov/pubmed/2341038	Gene. 1990 Mar 30;88(1):47-55	LP7PAC	AAA88220
Salmonella phage ST64T	gp52	Salmonella typhimurium	40679	Headful (P22)			NC_004348.1	NP_720326.1
Enterobacteria phage CUS-3	gp21	Escherichia coli	40207	Headful (SF6)			CP000711.1	ABQ88401.1
Shigella phage Sf6	gp2	Shigella flexneri	39043	Headful (SF6)	http://www.ncbi.nlm.nih.gov/pubmed/15136040	J Mol Biol. 2004 May 28;339(2):379-94	NC_005344.1	AAQ12192
Endosymbiont phage APSE-1	gp18		36524	Headful (SF6)	http://www.ncbi.nlm.nih.gov/pubmed/10489345	Virology. 1999 Sep 15;262(1):104-13	AF157835	AAF03961.1
Iodobacteriophage phiPLPE	gp18	Iodobacter sp. CdM7	47453	Headful (phiPLPE)	http://www.ncbi.nlm.nih.gov/pubmed/22792219	PLoS One. 2012;7(7):e40102	NC_011142.1	YP_002128452.1
Yersinia phage PY100	gp18	Yersinia sp.	50291	Headful (phiPLPE)	http://www.ncbi.nlm.nih.gov/pubmed/17965162	J Bacteriol. 2008 Jan;190(1):332-42	AM076770.1	CAJ28416
Klebsiella phage JD001	gp34	Klebsiella pneumoniae	48814	Headful (phiPLPE)	http://www.ncbi.nlm.nih.gov/pubmed/23166250	J Virol. 2012 Dec;86(24):13843	NC_020204.1	YP_007392855.1
Enterobacteria phage 933W	gp51	Escherichia coli	61670	Headful (933W)	http://www.ncbi.nlm.nih.gov/pubmed/10074068	J Bacteriol. 1999 Mar;181(6):1767-78	NC_000924.1	NP_049511.1
Burkholderia phage Bcep22	gp49	Burkholderia cenocepacia	63879	Headful (933W)	http://www.ncbi.nlm.nih.gov/pubmed/21804006	J Bacteriol. Oct 2011; 193(19): 5300–5313	NC_005262.2	AAQ54982.1
Pseudomonas phage D3112	gp26	Pseudomonas aeruginosa	37611	Host ends (D3112)	http://www.ncbi.nlm.nih.gov/pubmed/14702309	J Bacteriol. 2004 Jan;186(2):400-10	NC_005178.1	NP_938233.1
Haemophilus phage SuMu	gp26	Haemophilus parasuis	37151	Host ends (D3112)	http://www.ncbi.nlm.nih.gov/pubmed/22823751	BMC Genomics. 2012 Jul 23;13:331	NC_019455.1	YP_007002934
Pseudomonas phage MP22	gp25	Pseudomonas aeruginosa	36409	Host ends (D3112)	http://www.ncbi.nlm.nih.gov/pubmed/17768233	Microbiology. 2007 Sep;153(Pt 9):2885-95	DQ873690.1	YP_001469154
Enterobacteria phage Mu	gp28	Escherichia coli	36717	Host ends (Mu)	http://www.ncbi.nlm.nih.gov/pubmed/11922669	J Mol Biol. 2002 Mar 29;317(3):337-59	NC_000929	NP_050632.1
Psedumonas phage B3	gp31	Pseudomonas aeruginosa	38439	Host ends (Mu)	http://www.ncbi.nlm.nih.gov/pubmed/15375138	J Bacteriol. 2004 Oct;186(19):6560-74	NC_006548.1	YP_164067
Burkholderia phage BcepMu	gp28	Burkholderia cenocepacia	36748	Host ends (Mu)	http://www.ncbi.nlm.nih.gov/pubmed/15184022	J Mol Biol. 2004 Jun 25;340(1):49-65	NC_005882.1	YP_024701.1
Ralstonia phage DU_RP_I	gp39	Ralstonia sp.	40657	Not described			NC_047888.1	YP_009795373.1
Ralstonia phage P-PSG-11	gp19	Ralstonia sp.	40313	Not described			MN270889.1	QFP93689.1
Ralstonia phage P-PSG-11-1	gp19	Ralstonia sp.	40313	Not described			MN270890.1	QFP93737.1
Ralstonia phage RsoP1EGY	gp6	Ralstonia sp.	41297	Not described			NC_047946.1
Ralstonia phage vRsoP-WF2	gp52	Ralstonia solanacearum	40690	In this work			MN685189
Ralstonia phage vRsoP-WM2	gp52	Ralstonia solanacearum	40688	In this work			MN685190
Ralstonia phage vRsoP-WR2	gp53	Ralstonia solanacearum	41158	In this work			MN685191
